# Supplementary material for: Synthesis, structures and reactivity of 2-phosphorylmethyl-1H-pyrrolato complexes of titanium, yttrium and zinc
Source: Royal Society of Chemistry journal article supplement (doi:10.1039/b908394d), 2009-01-01
Supplement: b908394d.pdf [file b908394d.pdf]

## Synthesis, Structures and Reactivity of 2-Phosphorylmethyl-1H-pyrrolato Complexes of Titanium, Yttrium and Zinc

Lewis M. Broomfield, Joseph Wright, David L. Hughes and Manfred Bochmann\*

### Supporting Information

$^1\text{H}$  and  $^1\text{H}\{^{31}\text{P}\}$  NMR spectra of the  $\text{PCH}_2$  region of complex **6a**;

NMR spectra of the reaction intermediates of **3a** with  $\text{Y}[\text{N}(\text{SiHMe}_2)_3](\text{THF})_2$ ;

$^1\text{H}$  NMR spectrum of **9b**.

$^{13}\text{C}$  NMR chemical shifts of 2-phosphorylmethyl-1H-pyrroles and their complexes.

$^{13}\text{C}$  NMR data of *tert*-butyl substituted pyrrole aldehydes.

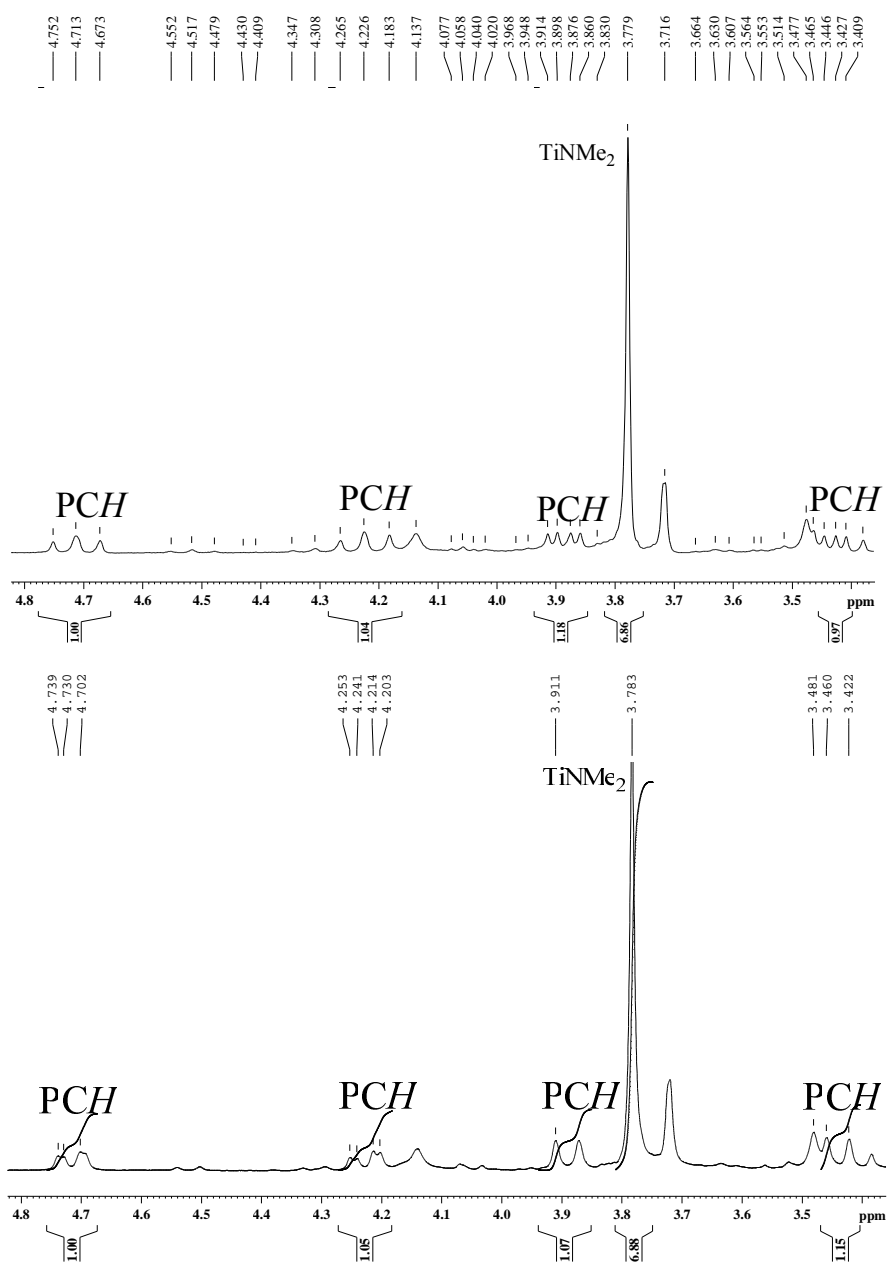

Figure S1. Top:  $^1\text{H}$  NMR spectrum of complex **6a** in the region of the P-CH<sub>2</sub> signals, showing the coupling pattern of the diastereotopic hydrogen atoms. Bottom: The same region with  $^{31}\text{P}$  decoupling.

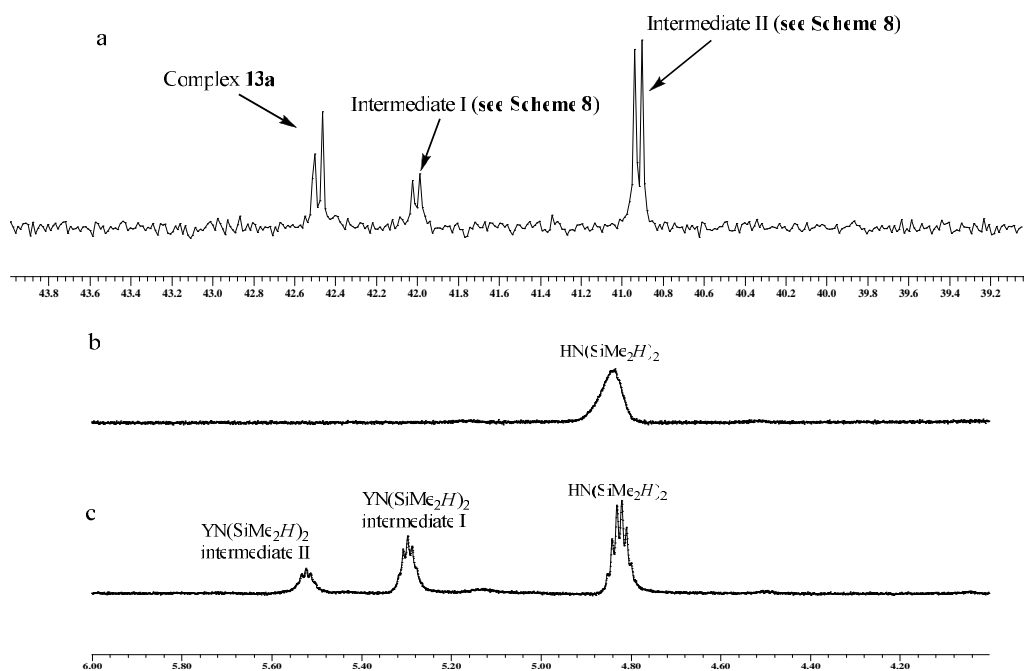

Figure S2. (a)  $^{31}\text{P}\{^1\text{H}\}$  NMR spectrum of the reaction of **3a** with  $\text{Y}[\text{N}(\text{SiHMe}_2)_2]_3(\text{THF})_2$  after 3 min. (b) and (c) show sections of the  $^1\text{H}$  NMR spectrum of the in-situ NMR experiment of the same reaction after the same time period.

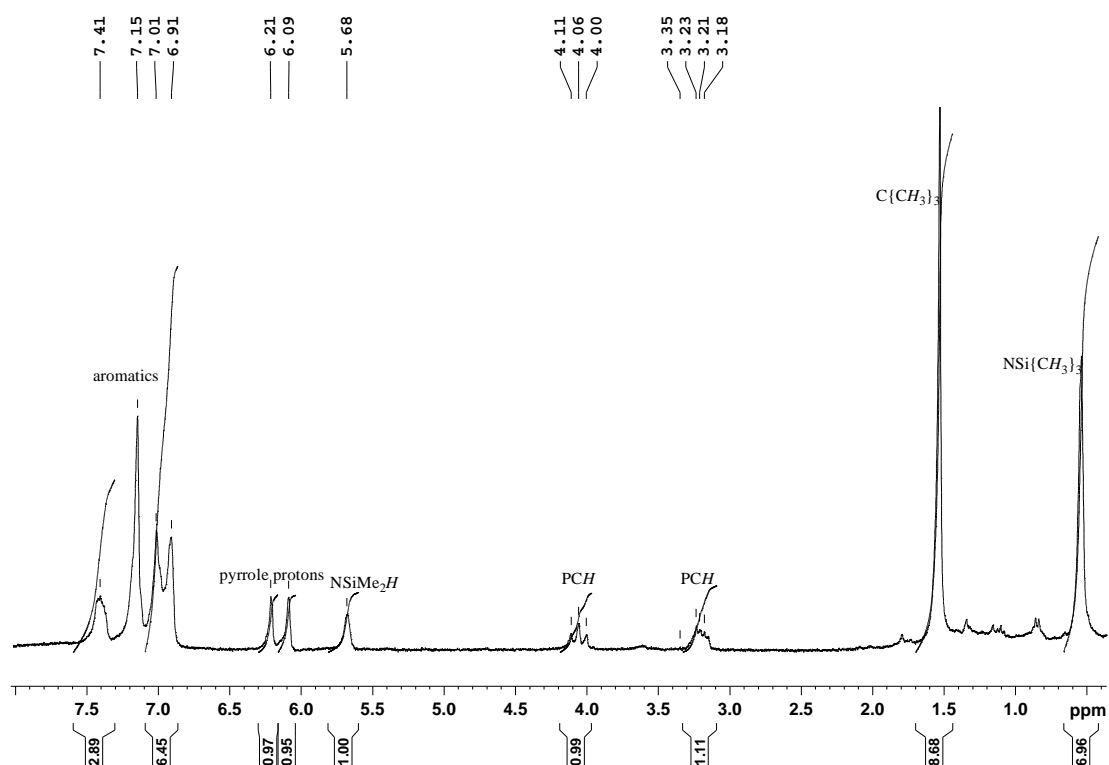

Figure S3.  $^1\text{H}$  NMR spectrum of  $\text{Y}[\text{N}(\text{SiHMe}_2)_2][\text{NC}_4\text{H}_3(5\text{-Bu})-2\text{-CH}_2\text{P}(\text{O})\text{Ph}_2]_2$  (**9b**).

<sup>13</sup>C NMR chemical shifts of 2-phosphorylmethyl-1*H*-pyrroles and their complexes

| Compound  | <sup>13</sup> C NMR chemical shift (δ), C-P coupling constants in parenthesis (Hz) |                             |                                 |                               |                                |                               |                               |                               |                                |                  |                  |
|-----------|------------------------------------------------------------------------------------|-----------------------------|---------------------------------|-------------------------------|--------------------------------|-------------------------------|-------------------------------|-------------------------------|--------------------------------|------------------|------------------|
|           | Phenyl or cyclohexyl carbons                                                       |                             |                                 |                               | Pyrrole carbons                |                               |                               |                               |                                | Alkyl carbons    |                  |
|           | C-P                                                                                | <i>ortho</i>                | <i>meta</i>                     | <i>para</i>                   | C <sup>2</sup>                 | C <sup>3</sup>                | C <sup>4</sup>                | C <sup>5</sup>                | CH <sub>2</sub> P              | CMe <sub>3</sub> | CMe <sub>3</sub> |
| <b>2a</b> | 131.93 (99.3)                                                                      | 128.38(11.7)                | 131.22 (9.3)                    | 131.01 (2.5)                  | 124.18 (8.2)                   | 115.10 (6.6)                  | 121.60 (3.0)                  | 110.42 (3.0)                  | 30.42 (69.0)                   | N/A              | N/A              |
| <b>2b</b> | 132.01 (98.8)                                                                      | 128.50 (11.5)               | 131.33 (9.3)                    | 131.75 (2.7)                  | 123.60 (7.1)                   | 11140 (6.6)                   | 107.79 (2.7)                  | 144.73 (3.3)                  | 31.75 (69.7)                   | 30.62            | 27.77            |
| <b>2c</b> | 132.38 (99.0)                                                                      | 128.40 (11.5)               | 131.38 (9.3)                    | 131.88 (2.7)                  | 123.86 (8.2)                   | 114.54 (6.6)                  | 136.80 (3.3)                  | 115.81 (3.3)                  | 30.72 (68.6)                   | 30.77            | 27.93            |
| <b>2d</b> | 23.58 (57.1)                                                                       | 26.81 (2.7),<br>26.65 (2.7) | 25.76 (2.8),<br>25.52 (3.0)     | 26.03                         | 125.78 (7.1)                   | 114.70 (5.5)                  | 121.32 (2.7)                  | 110.71 (2.2)                  | 36.24 (64.2)                   | N/A              | N/A              |
| <b>2e</b> | 23.80 (57.6)                                                                       | 26.85 (3.0),<br>26.70 (3.0) | 25.75 (2.3),<br>25.46 (3.0)     | 26.04                         | 125.70 (7.2)                   | 114.70 (5.5)                  | 137.02 (2.7)                  | 115.31 (2.7)                  | 36.28 (64.2)                   | 30.79            | 28.01            |
| <b>3a</b> | 131.97 (99.3)                                                                      | 128.58 (11.8)               | 130.83 (9.4)                    | 131.96 (2.6)                  | 121.03 (9.4)                   | 108.20 (7.5)                  | 118.23                        | 107.86                        | 29.73 (69.3)                   | N/A              | N/A              |
| <b>3b</b> | 132.15 (98.8)                                                                      | 130.93 (12.1)               | 131.24 (9.3)                    | 131.99 (2.7)                  | 119.21 (9.3)                   | 107.58 (7.7)                  | 102.03 (1.1)                  | 142.65 (3.3)                  | 30.08 (69.2)                   | 30.46            | 31.34            |
| <b>3c</b> | 132.11 (99.4)                                                                      | 128.54 (11.5)               | 130.51 (9.3)                    | 131.70 (2.7)                  | 120.80 (9.3)                   | 113.02 (7.7)                  | 135.54 (3.3)                  | 106.93 (1.1)                  | 30.45 (69.2)                   | 31.67            | 30.42            |
| <b>3d</b> | 22.45 (57.8)                                                                       | 26.66 (2.0),<br>26.50 (2.4) | 25.66 (2.6),<br>25.07 (3.4)     | 25.87                         | 122.87 (8.8)                   | 107.08 (7.1)                  | 117.72                        | 107.80                        | 36.56 (63.7)                   | N/A              | N/A              |
| <b>3e</b> | 23.29 (57.3)                                                                       | 27.22 (4.0),<br>26.55 (4.6) | 25.60 (2.6),<br>24.97 (3.3)     | 25.89                         | 122.90 (7.7)                   | 105.75 (6.8)                  | 135.61                        | 112.64                        | 35.72 (62.9)                   | 31.79            | 30.48            |
| <b>4a</b> | 129.82<br>(102.4)                                                                  | 128.41 (12.5)               | 131.45 (11.2)                   | 132.21 (3.9)                  | 122.74 (7.9)                   | 109.18 (7.7)                  | 131.81                        | 107.65                        | 30.39 (64.8)                   | N/A              | N/A              |
| <b>5c</b> | 132.16-131.41                                                                      |                             |                                 |                               | 121.49 (9.2)                   | 106.44 (6.5)                  | 132.51                        | 125.79                        | 31.61 (65.8)                   | 33.00            | 31.05            |
| <b>5d</b> | 27.07-25.08                                                                        |                             |                                 |                               | 124.55 (9.2),<br>123.19 (10.2) | 106.69-106.00                 | 131.94 (1.0),<br>131.46 (1.0) | 106.69-106.00                 | 35.37 (56.5),<br>34.59 (64.09) | N/A              | N/A              |
| <b>6c</b> | 132.84-127.63                                                                      |                             |                                 |                               | 123.90 (7.3),<br>123.73 (7.3)  | 105.30 (7.7),<br>104.21 (8.2) | under 132.84-<br>127.63       | 127.23 (1.6),<br>125.69 (1.3) | 31.12 (84.3)                   | 32.37, 31.90     | 31.81, 30.36     |
| <b>7b</b> | 130.42 (60.6),<br>129.29 (54.5)                                                    | 128.52 (12.1)               | 131.71 (10.3),<br>131.45 (10.3) | 132.83 (2.4),<br>132.08 (2.4) | 124.12 (11.3)                  | 109.94 (8.0)                  | 104.32                        | 151.58 (2.5)                  | 32.65 (86.0)                   | 32.55            | 32.93            |
| <b>8a</b> | Under 132.08-<br>129.07                                                            | 128.92 (11.8)               | Under 132.08-129.07             |                               | 119.47 (5.1)                   | 109.72 (7.5)                  | 135.55                        | 108.32                        | 29.64 (67.1)                   | N/A              | N/A              |
| <b>9b</b> | Under 132.43-<br>131.89                                                            | 128.55 (12.1)               | Under 132.43-131.89             |                               | 122.52 (9.9)                   | 110.41 (8.8)                  | 104.36                        | 153.24                        | 29.97 (66.9)                   | 33.04            | 33.56            |

<sup>13</sup>C NMR data of tert-butyl substituted pyrrole aldehydes

| Compound                                                                          | <sup>13</sup> C NMR chemical shift (δ) |                |                          |                          |                          |
|-----------------------------------------------------------------------------------|----------------------------------------|----------------|--------------------------|--------------------------|--------------------------|
|                                                                                   | CHO                                    | C <sup>2</sup> | C <sup>3</sup>           | C <sup>4</sup>           | C <sup>5</sup>           |
| 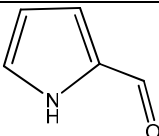 | 179.59                                 | 132.84         | 132.84, 127.23 or 122.10 | 132.84, 127.23 or 122.10 | 132.84, 127.23 or 122.10 |
|  | 179.20                                 | 132.48?        | 122.52 or 118.63         | 138.58?                  | 122.52 or 118.63         |
|  | 178.43                                 | 131.62?        | 122.83 or 107.21         | 122.83 or 107.21         | 152.08?                  |

Notes:

It was not possible to distinguish between H carrying ring carbons. ? indicates that unequivocal assignments of chemical shift for carbons other than those carrying Bu<sup>t</sup> groups was not possible using 2D <sup>1</sup>H/<sup>13</sup>C correlation experiments.
